# Supplementary material
Source: Springer Nature journal article supplement (https://www.springermedizin.de/resource/supplementary/12885_2008_1327_MOESM4_ESM.pdf/9471774)
Supplement: MOESM4 [file 9471774]

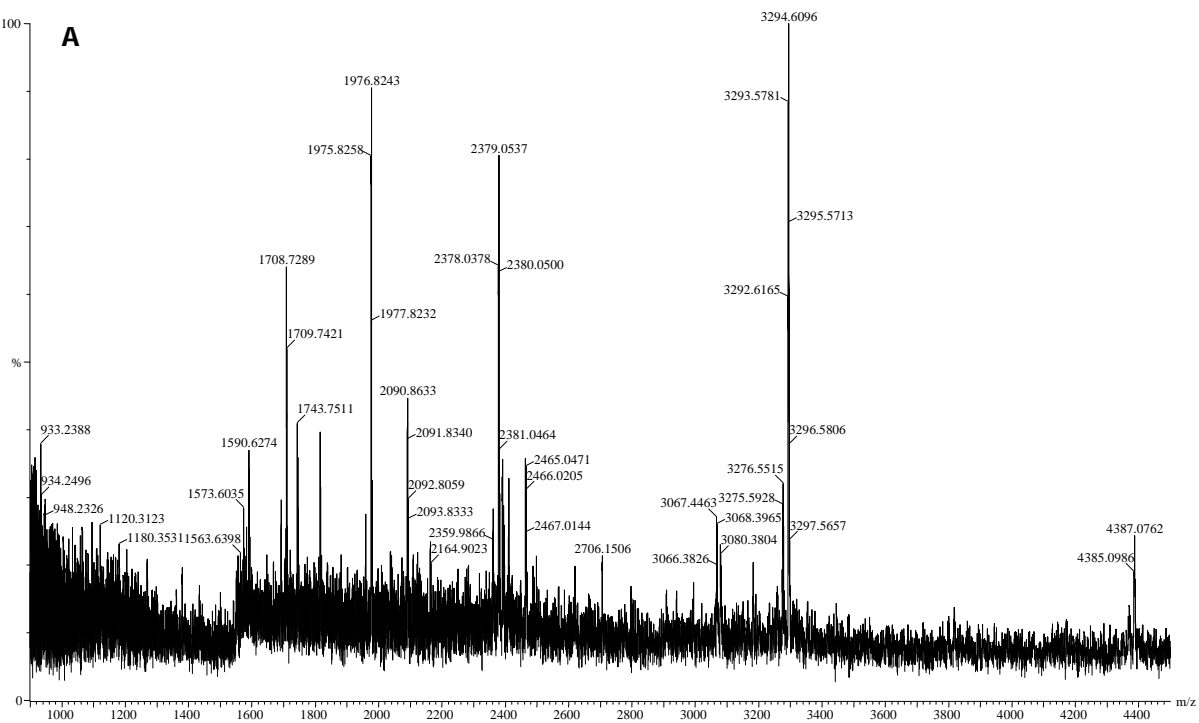

| Start-End | Mr (obs) | Mr (expt) | Mr (calc) | Delta | Miss | Score | Expect               | Sequence                           |
|-----------|----------|-----------|-----------|-------|------|-------|----------------------|------------------------------------|
| 35 – 49   | 1590.70  | 1589.69   | 1589.79   | -0.10 | 0    | 69    | 0.0014               | K.PPEIAHGYVEHSVR.Y                 |
| 58 – 72   | 1708.80  | 1708.79   | 1707.84   | -0.05 | 1    | 42    | 0.0041               | K.LRTEGDGVYTLNNEK.Q                |
| 78 – 94   | 1743.75  | 1742.74   | 1742.87   | -0.13 | 0    | 60    | 0.0110               | K.AVGDKLPECEAVCGKPK.N              |
| 19 – 49   | 3292.61  | 3291.60   | 3291.51   | 0.09  | 0    | 98    | 2.3·10 <sup>-8</sup> | A.VDSGNDVTDIADDGCPKPEIAHGYVEHSVR.Y |

Amino acid sequence of m/z 9198 haptoglobin alpha-1 chain (start: 18 – end: 101, 76% sequence coverage):

VDSGNDVTDI ADDGCPKPE IAHGYVEHSV RYQCKNYYKL RTEGDGVYTL NNEKQWINKA VGDKLPECEA VCGKPKNPAN PVQ

**B: Comparison of amino acid sequences**

**m/z 9198 marker**

VDSGNDVTDI ADDGCPKPE IAHGYVEHSV RYQCKNYYKL RTEGDGVYTL NNEKQWINKA VGDKLPECEA VCGKPKNPAN PVQ

**Haptoglobin alpha-1 chain (Mw 9192.21, pl 5.23)**

VDSGNDVTDI ADDGCPKPE IAHGYVEHSV RYQCKNYYKL RTEGDGVYTL NNEKQWINKA VGDKLPECEA VCGKPKNPAN PVQ

**Haptoglobin-related-protein (Mw 9492.64, pl 6.76)**

LYSGNDVTDI SDDRFKPKPE IANGYVEHLF RYQCKNYYRL RTEGDGVYTL NDKKQWINKA VGDKLPECEA VCGKPKNPAN PVQ

1 11 21 31 41 51 61 71 81
